# Supplementary material
Source: MDPI journal article supplement (https://www.mdpi.com/2076-3417/11/4/1677)

CMIN/DF = 1.958  
;CFI = .910; IFI= .911  
;;RMSEA = .063  
(Standardized estimates)

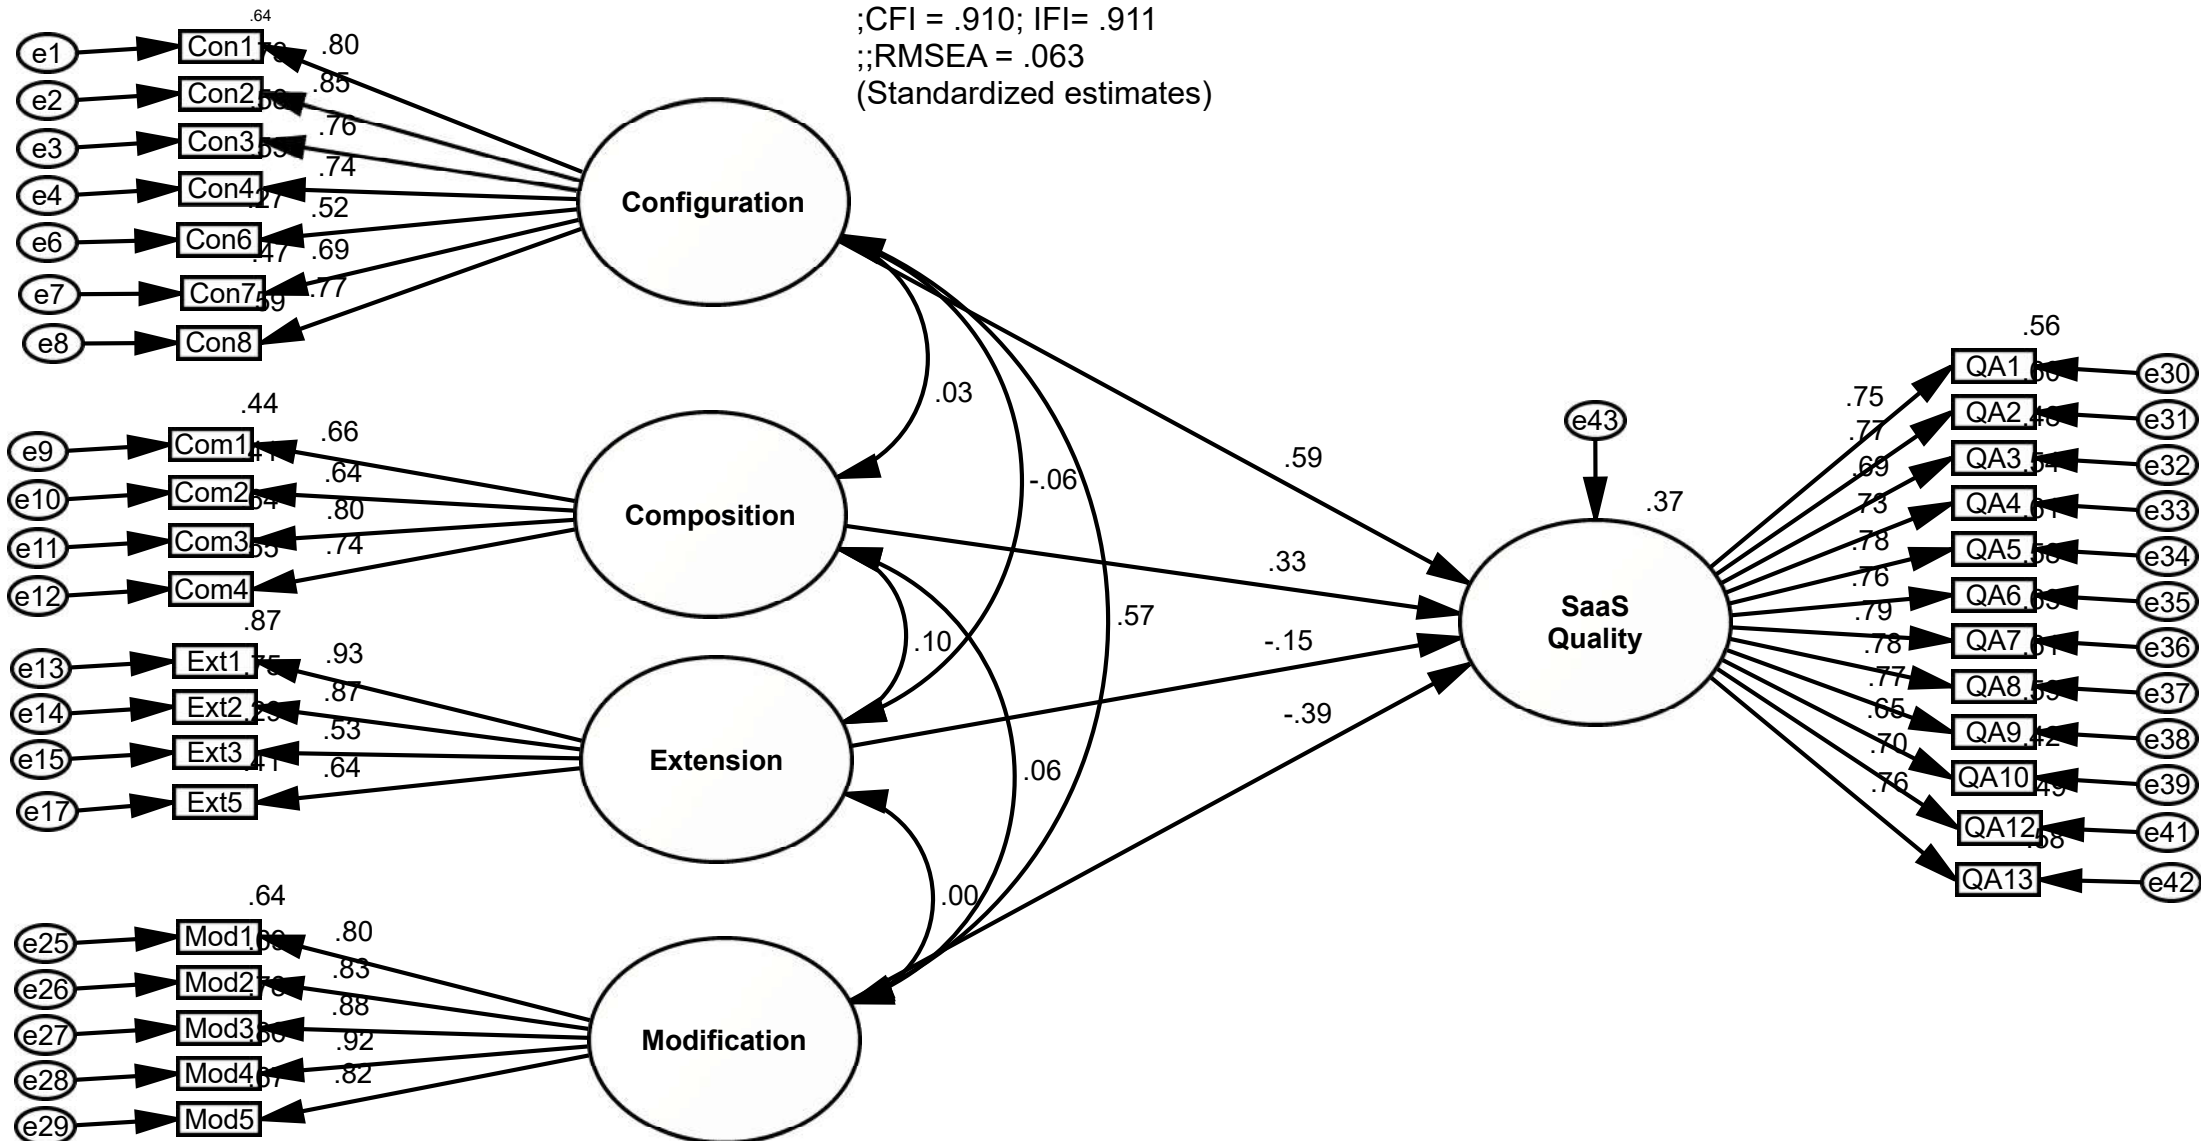

Supplement: s1 [file s1]

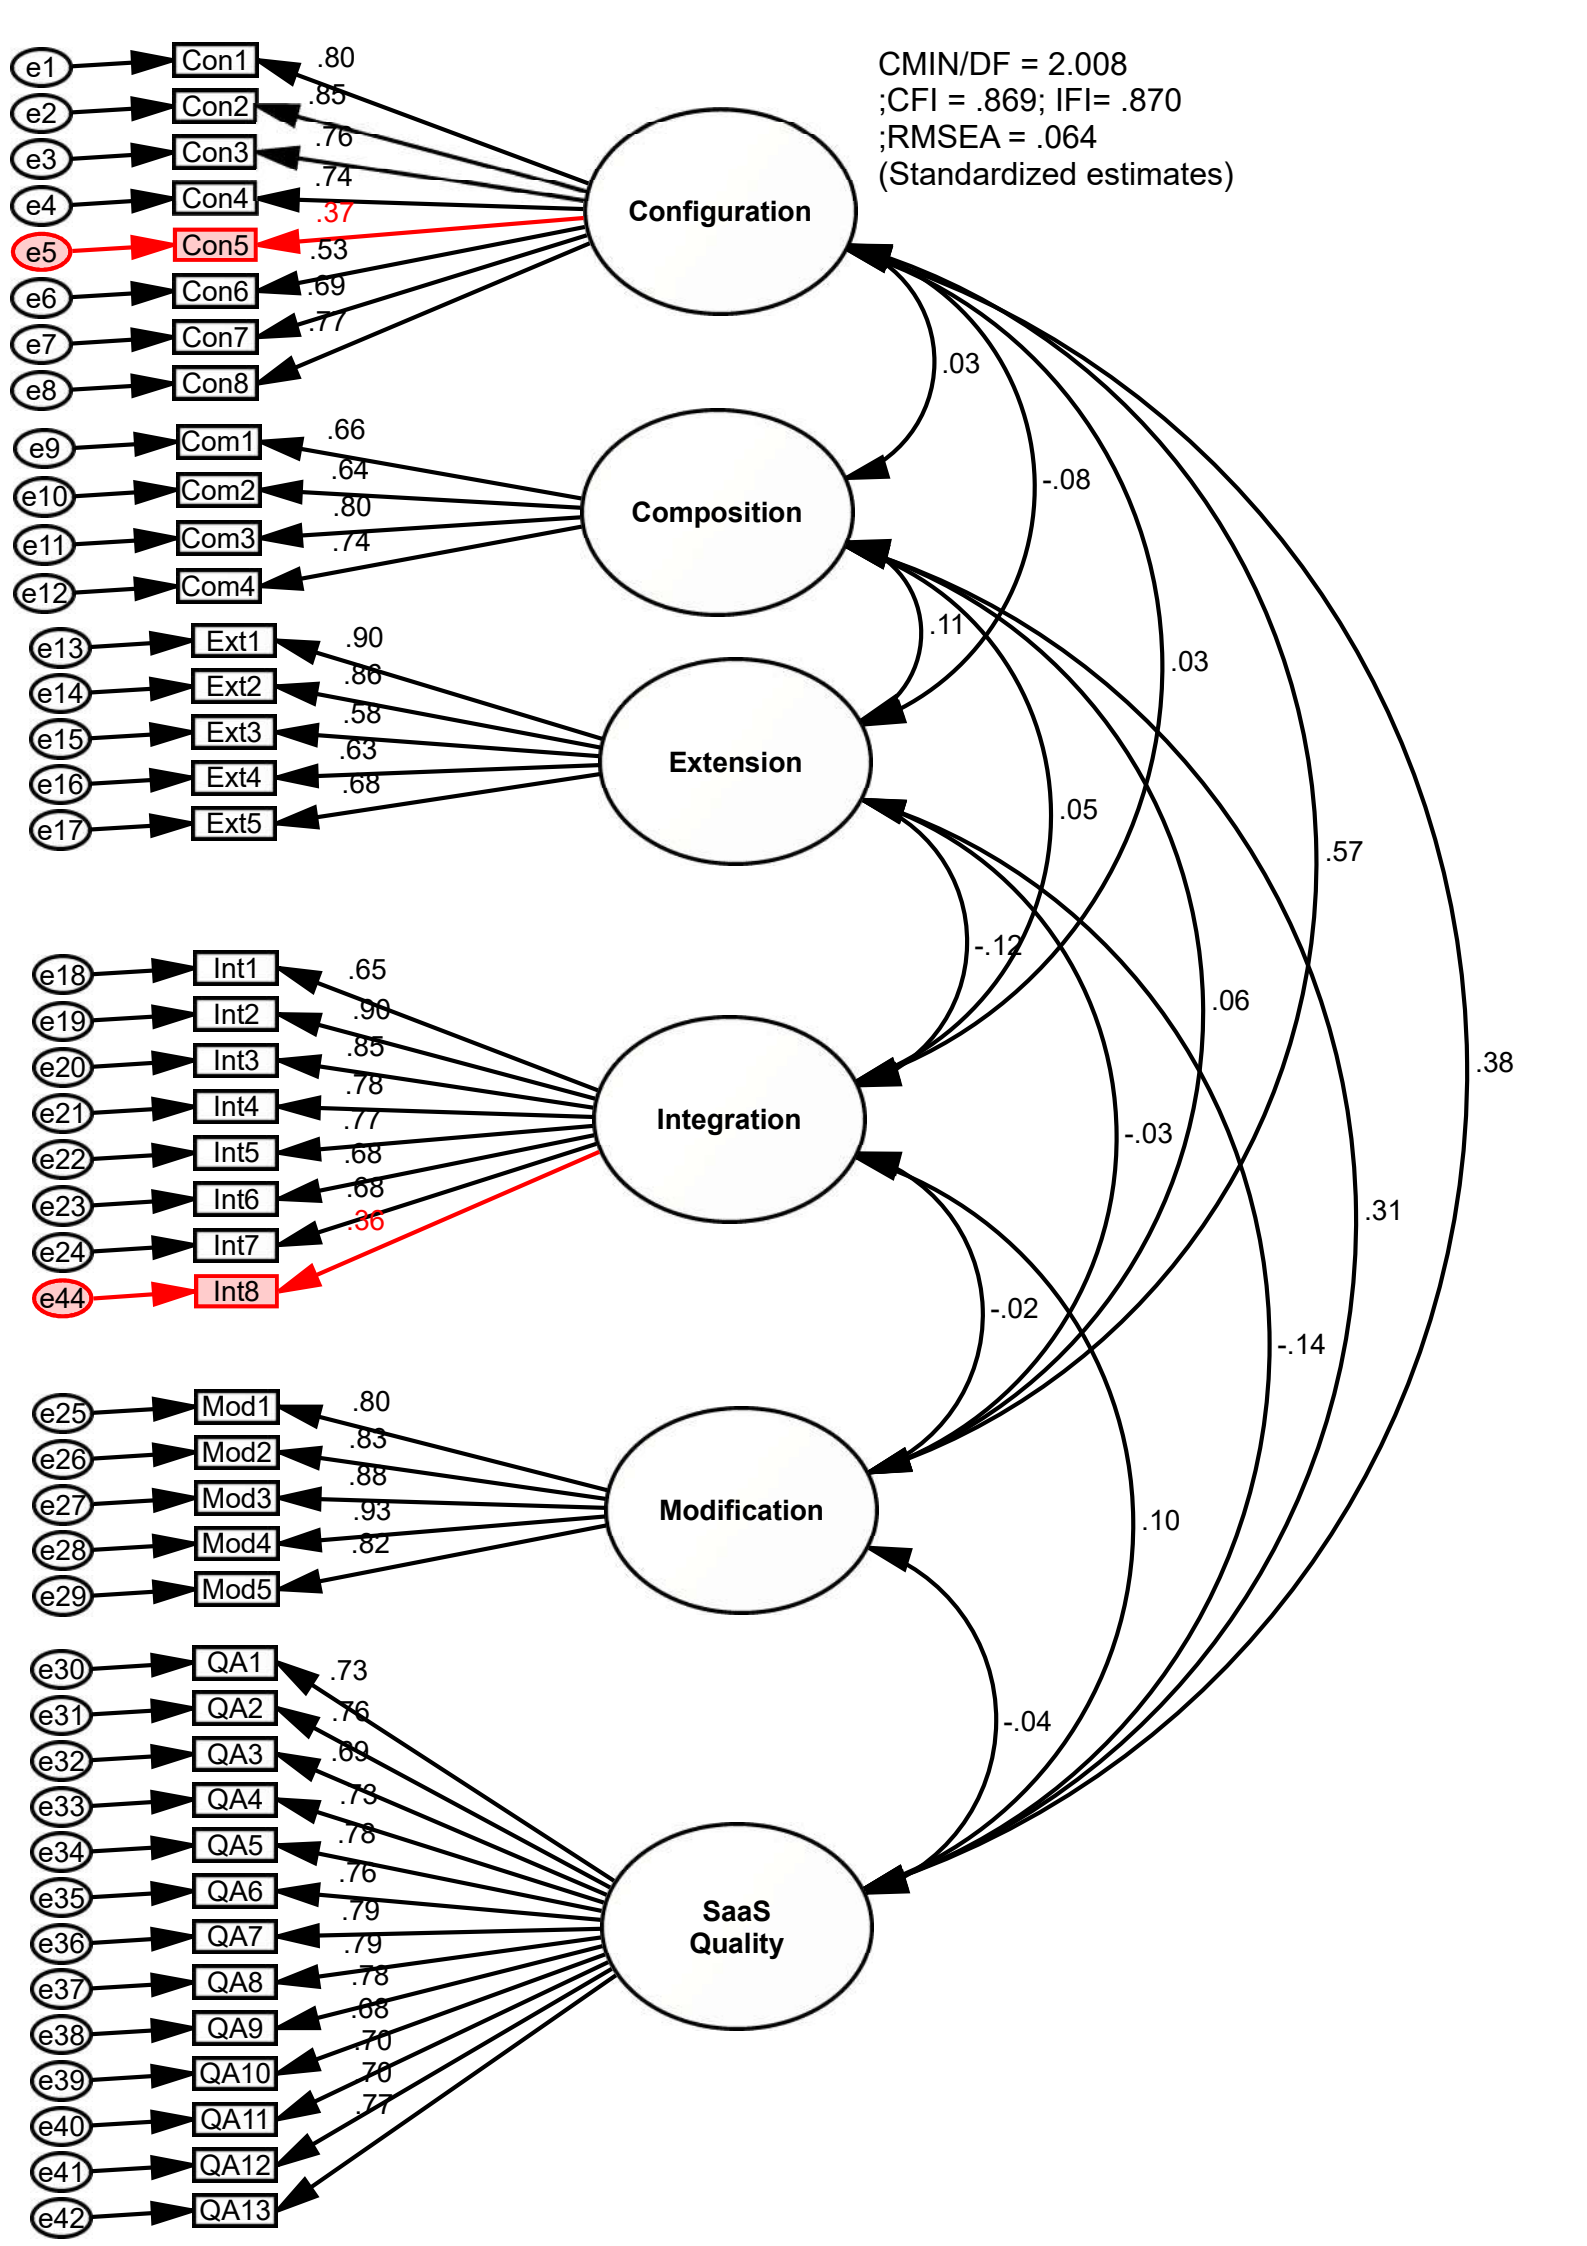

Supplement: s1 [file s1]

CMIN/DF = 1.814  
;CFI = .905; IFI= .906  
;;RMSEA = .058  
(Standardized estimates)

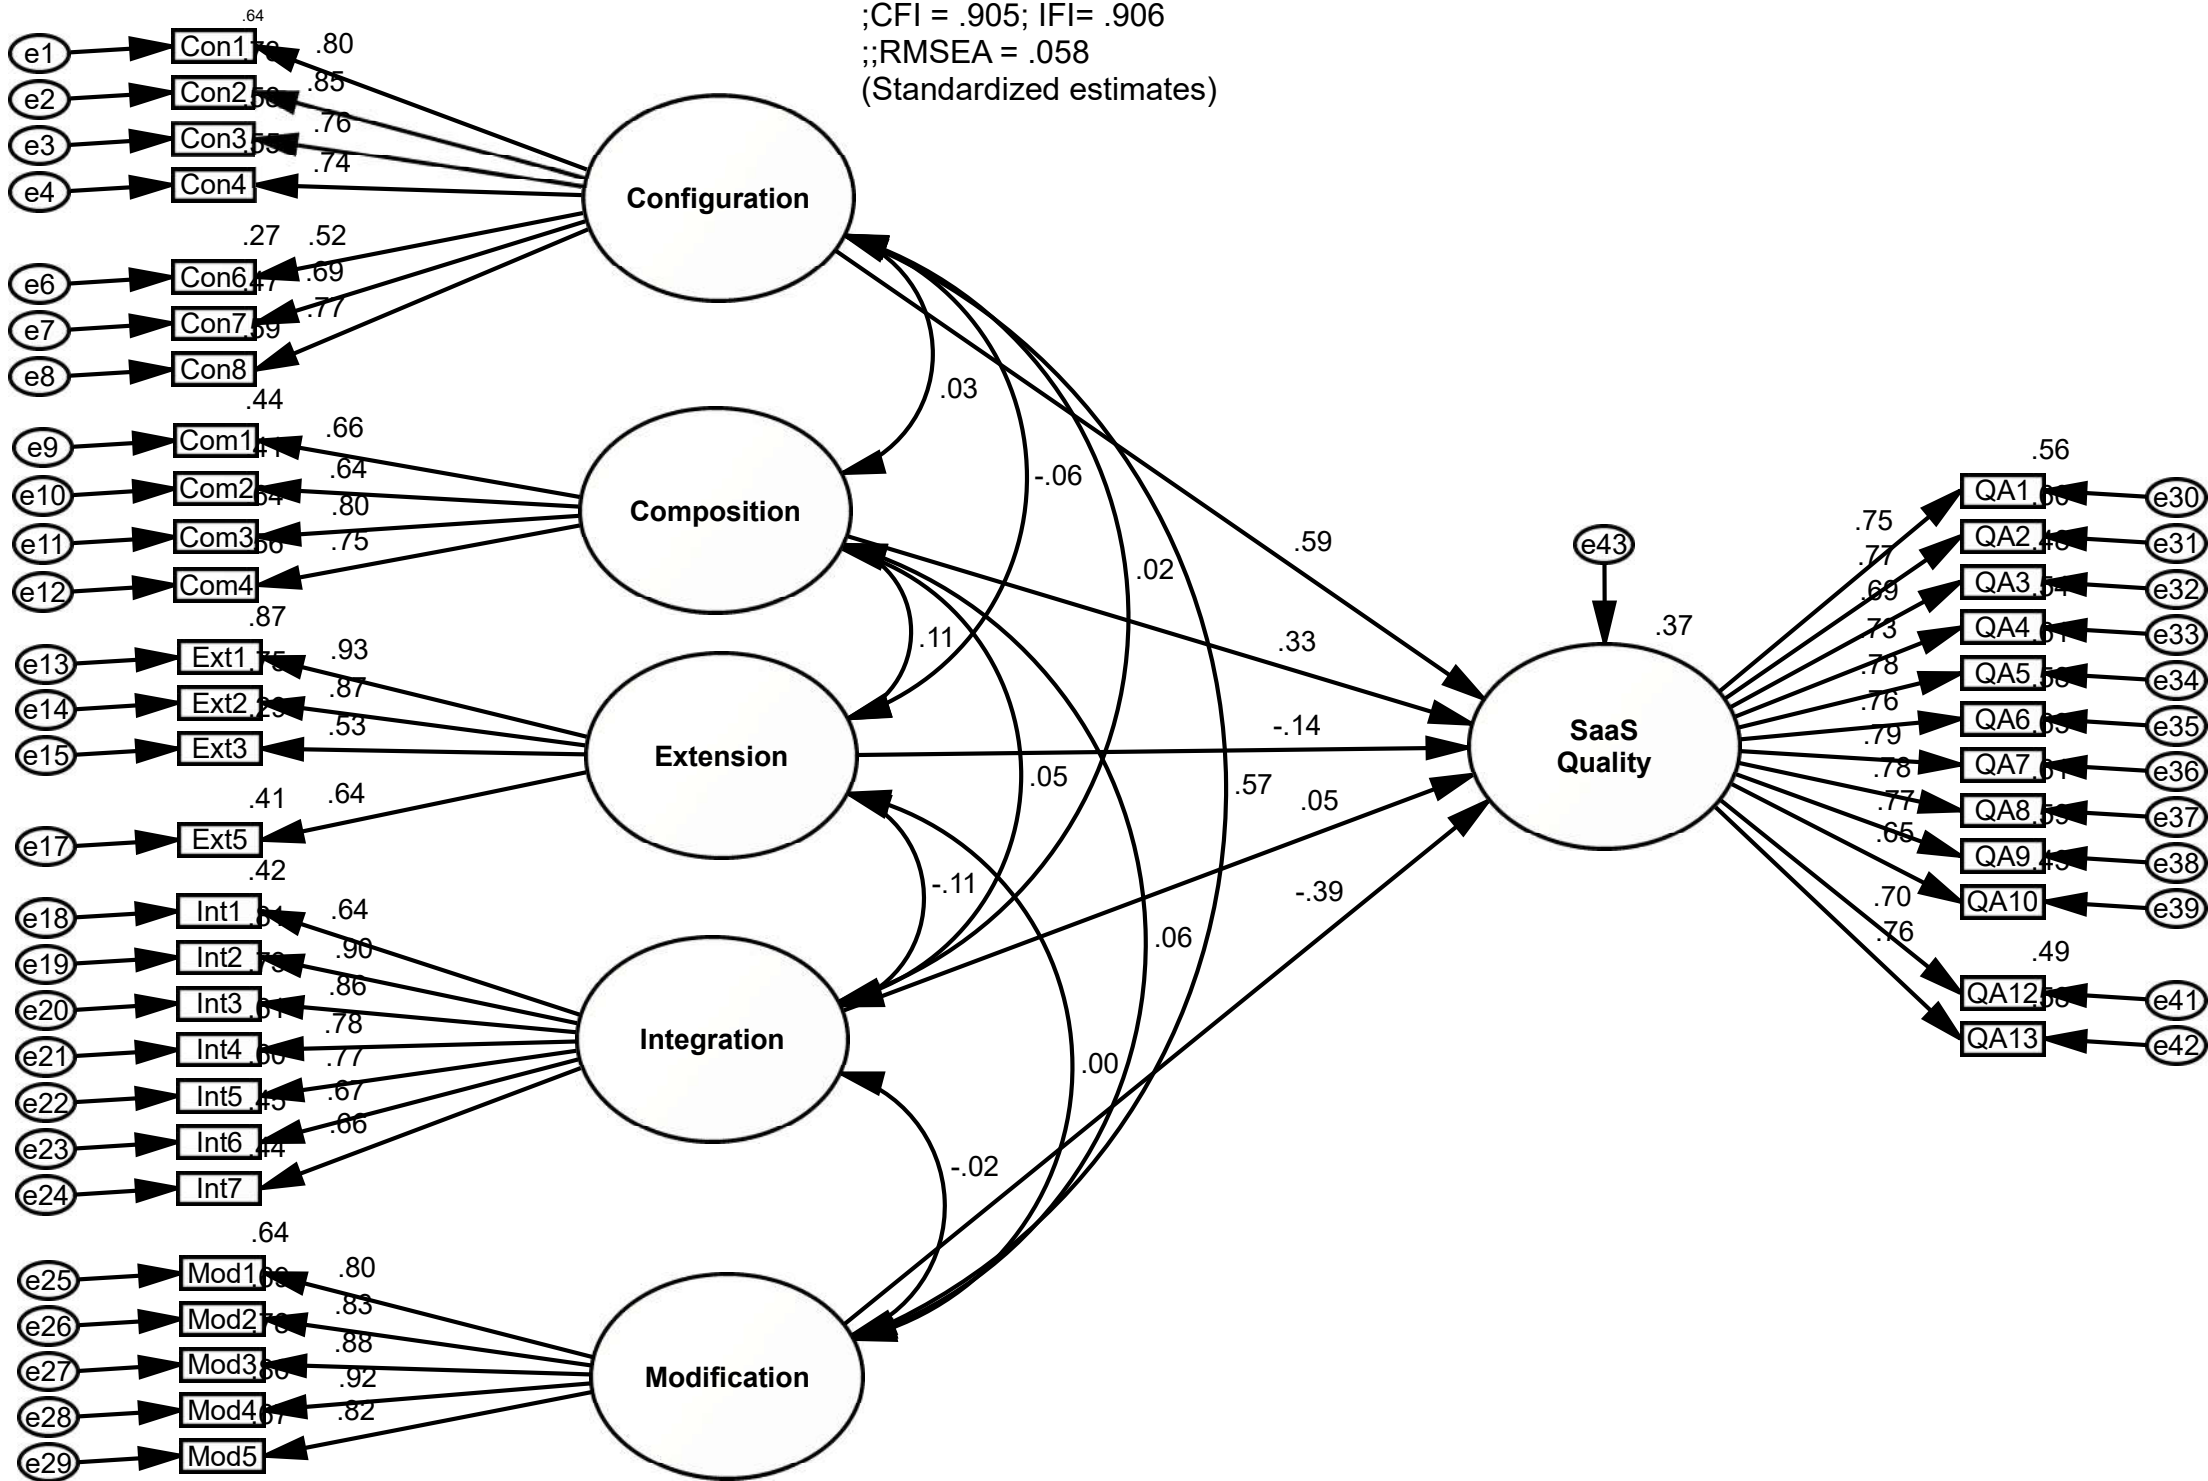

Supplement: s1 [file s1]

CMIN/DF = 1.975  
;CFI = .867; IFI= .868  
;RMSEA = .063  
(Standardized estimates)

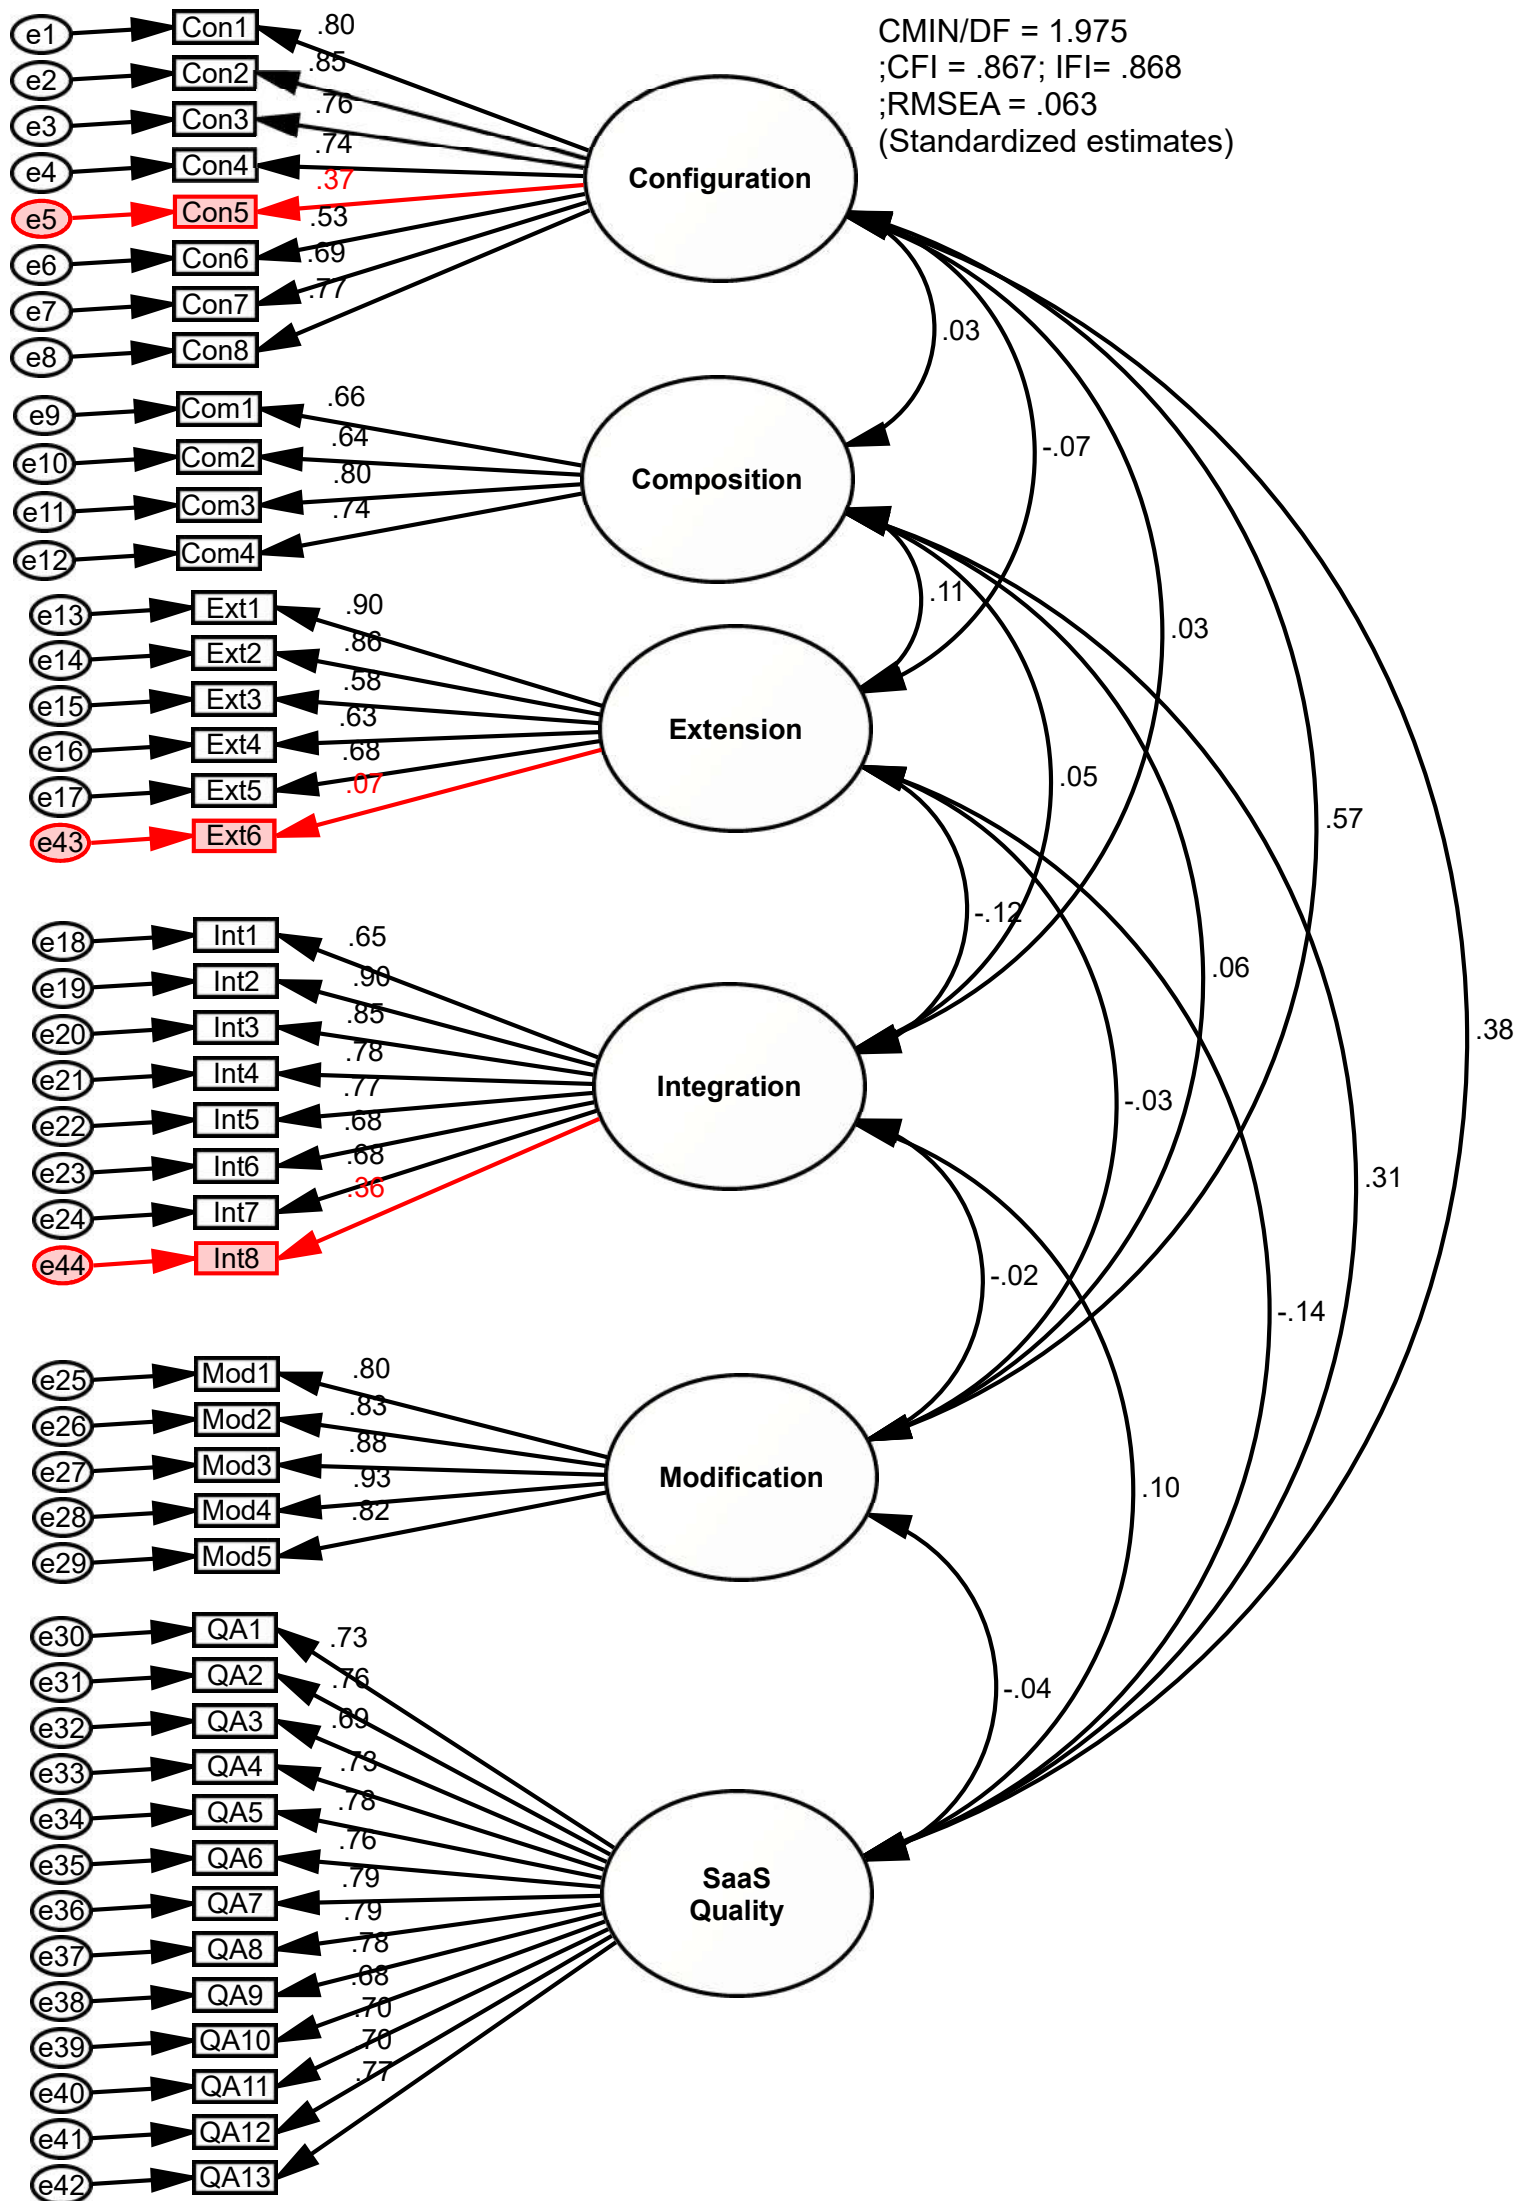

Supplement: s1 [file s1]

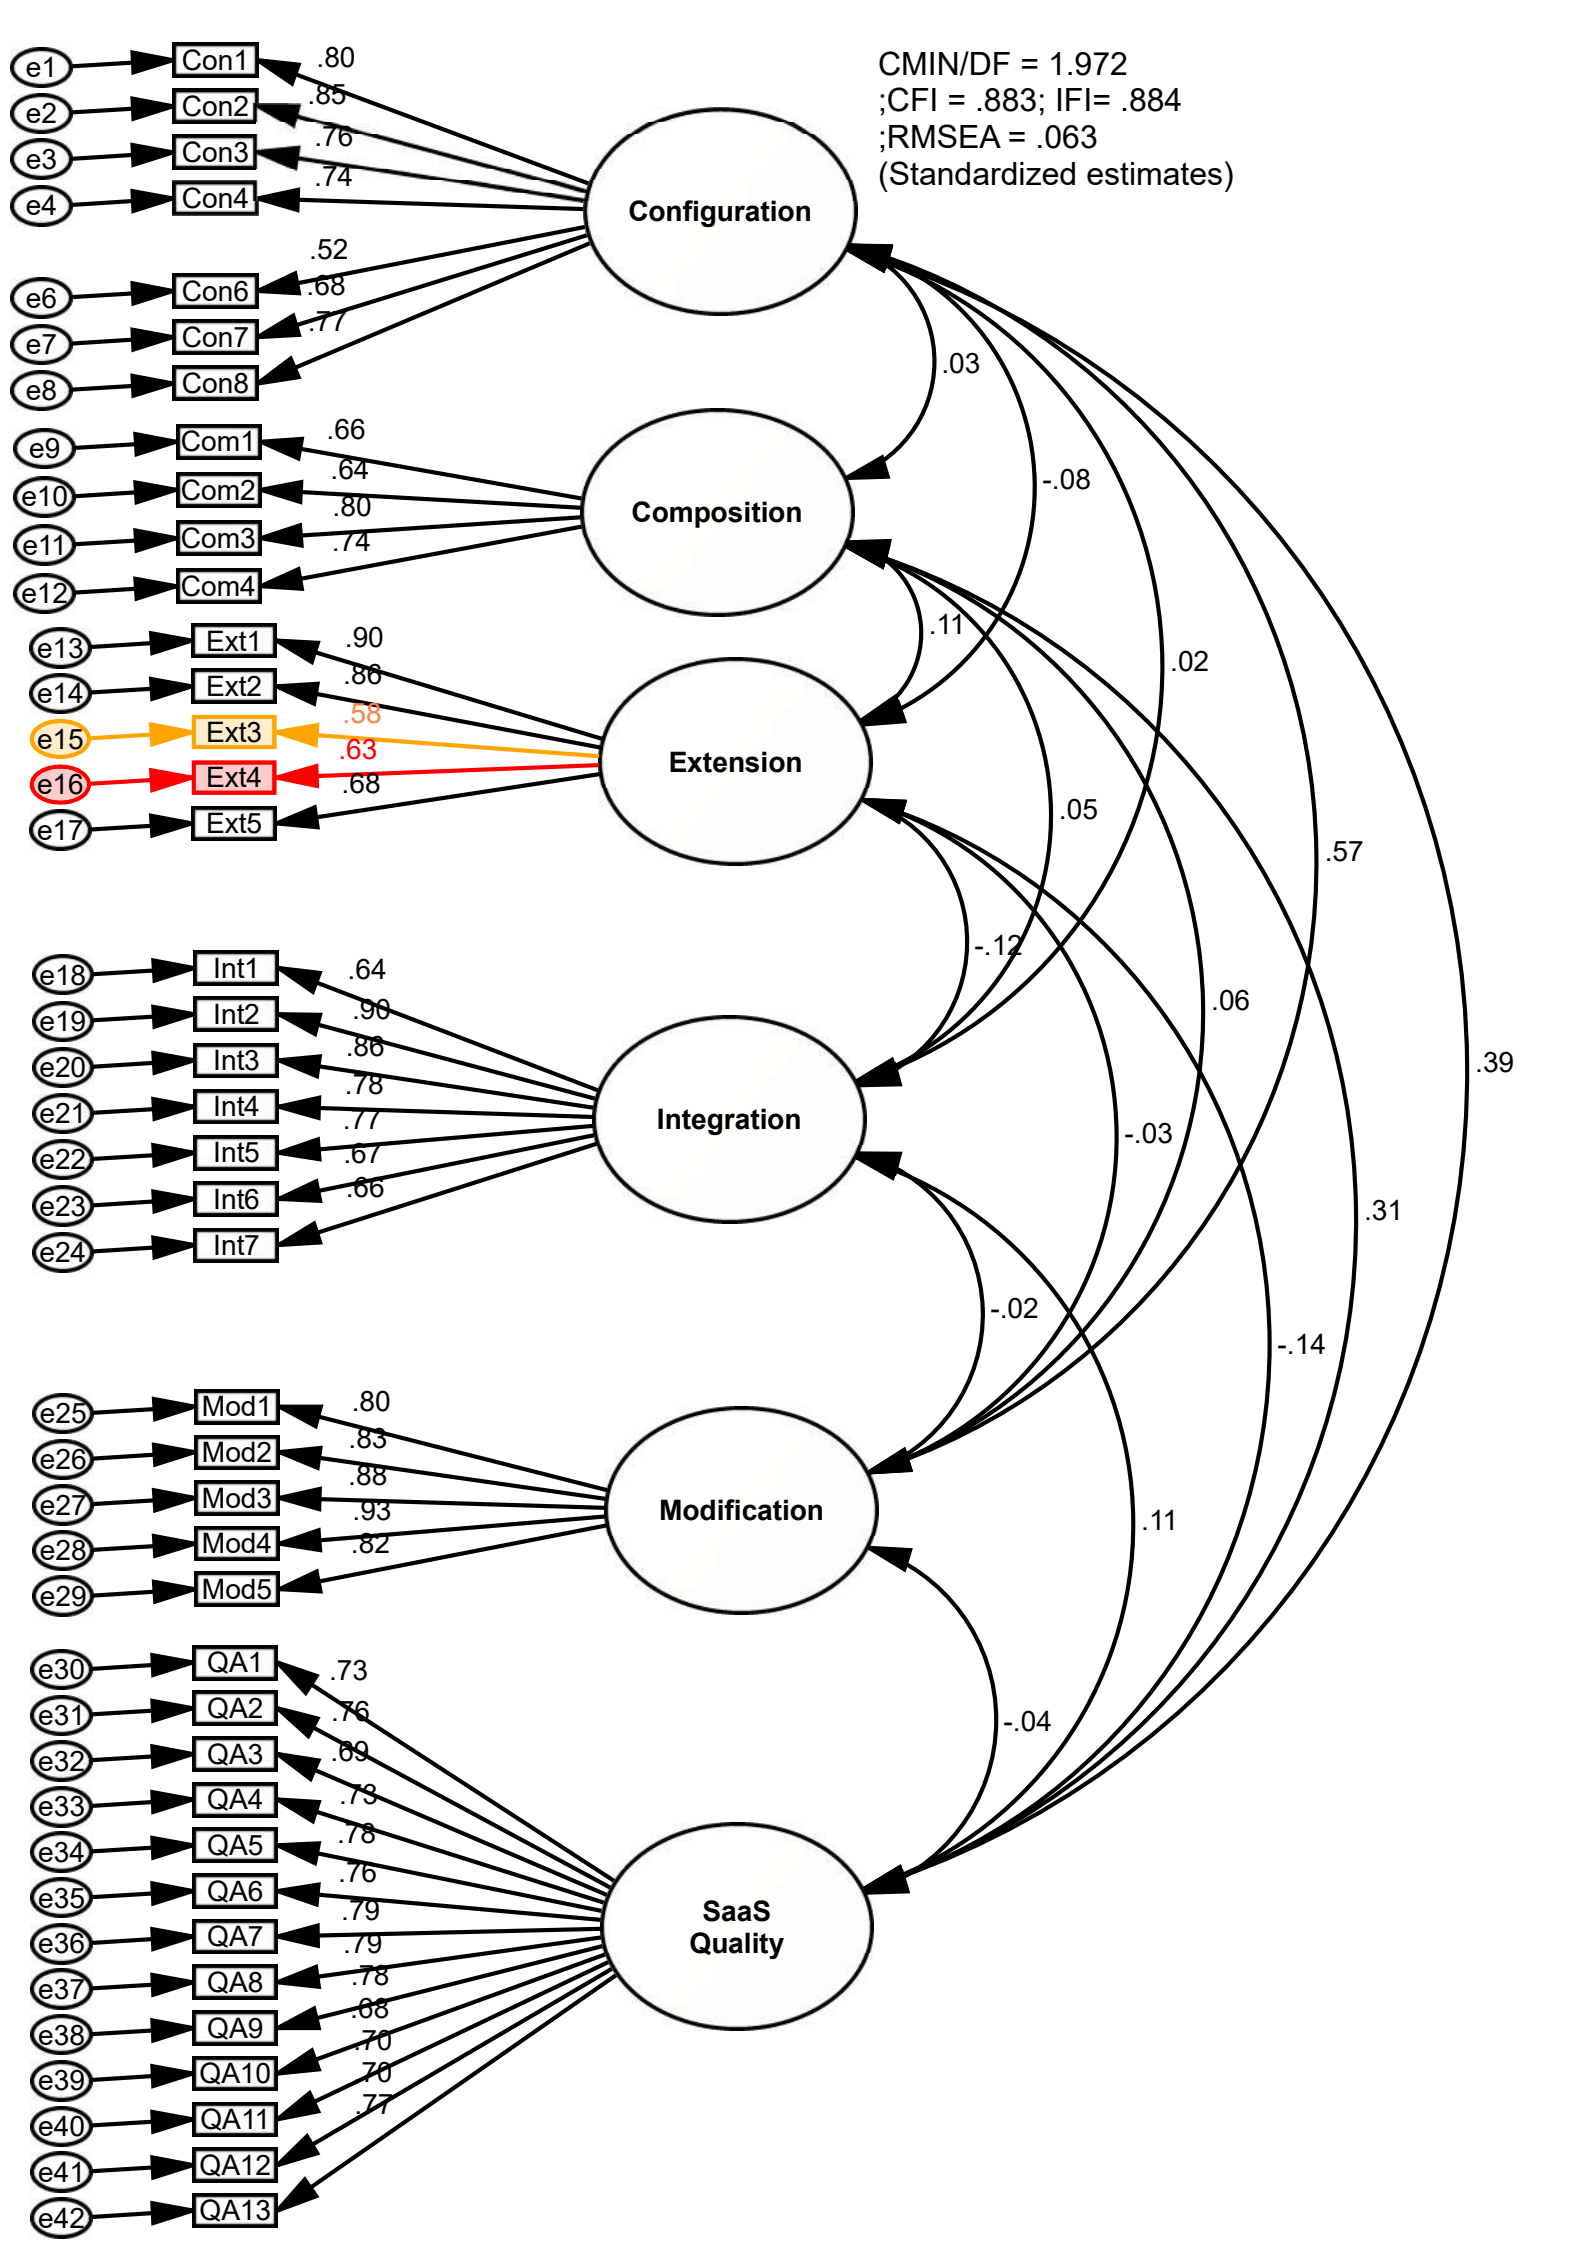

Supplement: s1 [file s1]

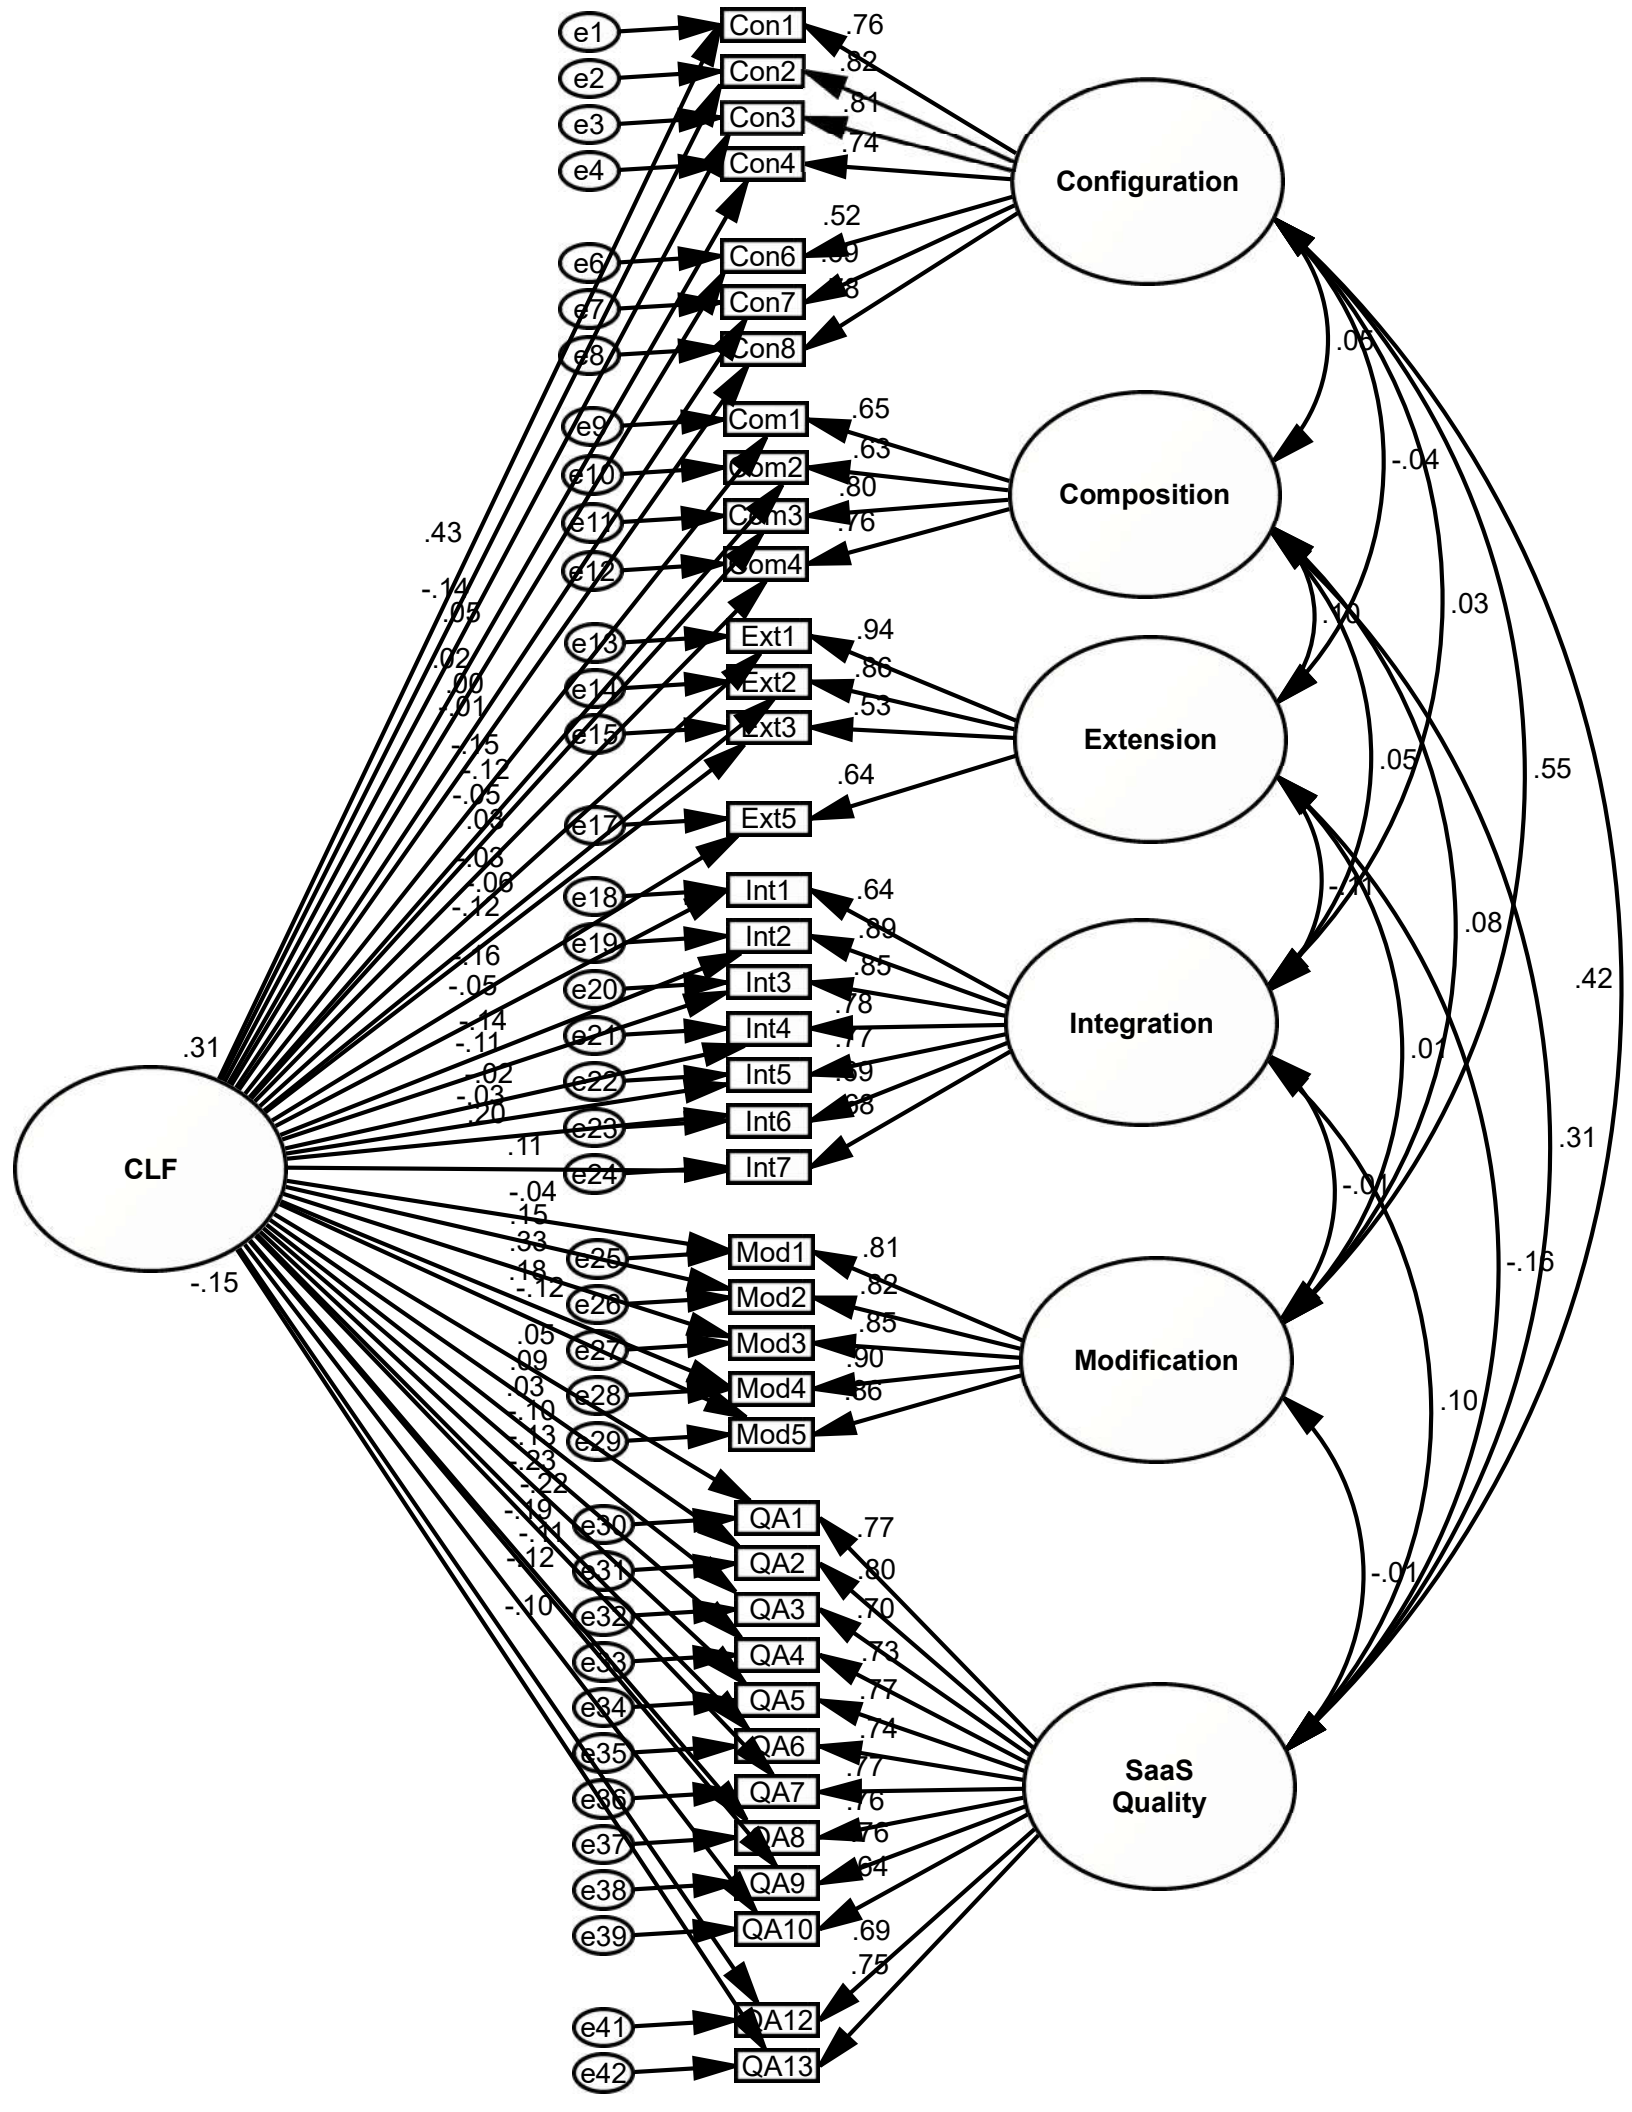

Supplement: s1 [file s1]

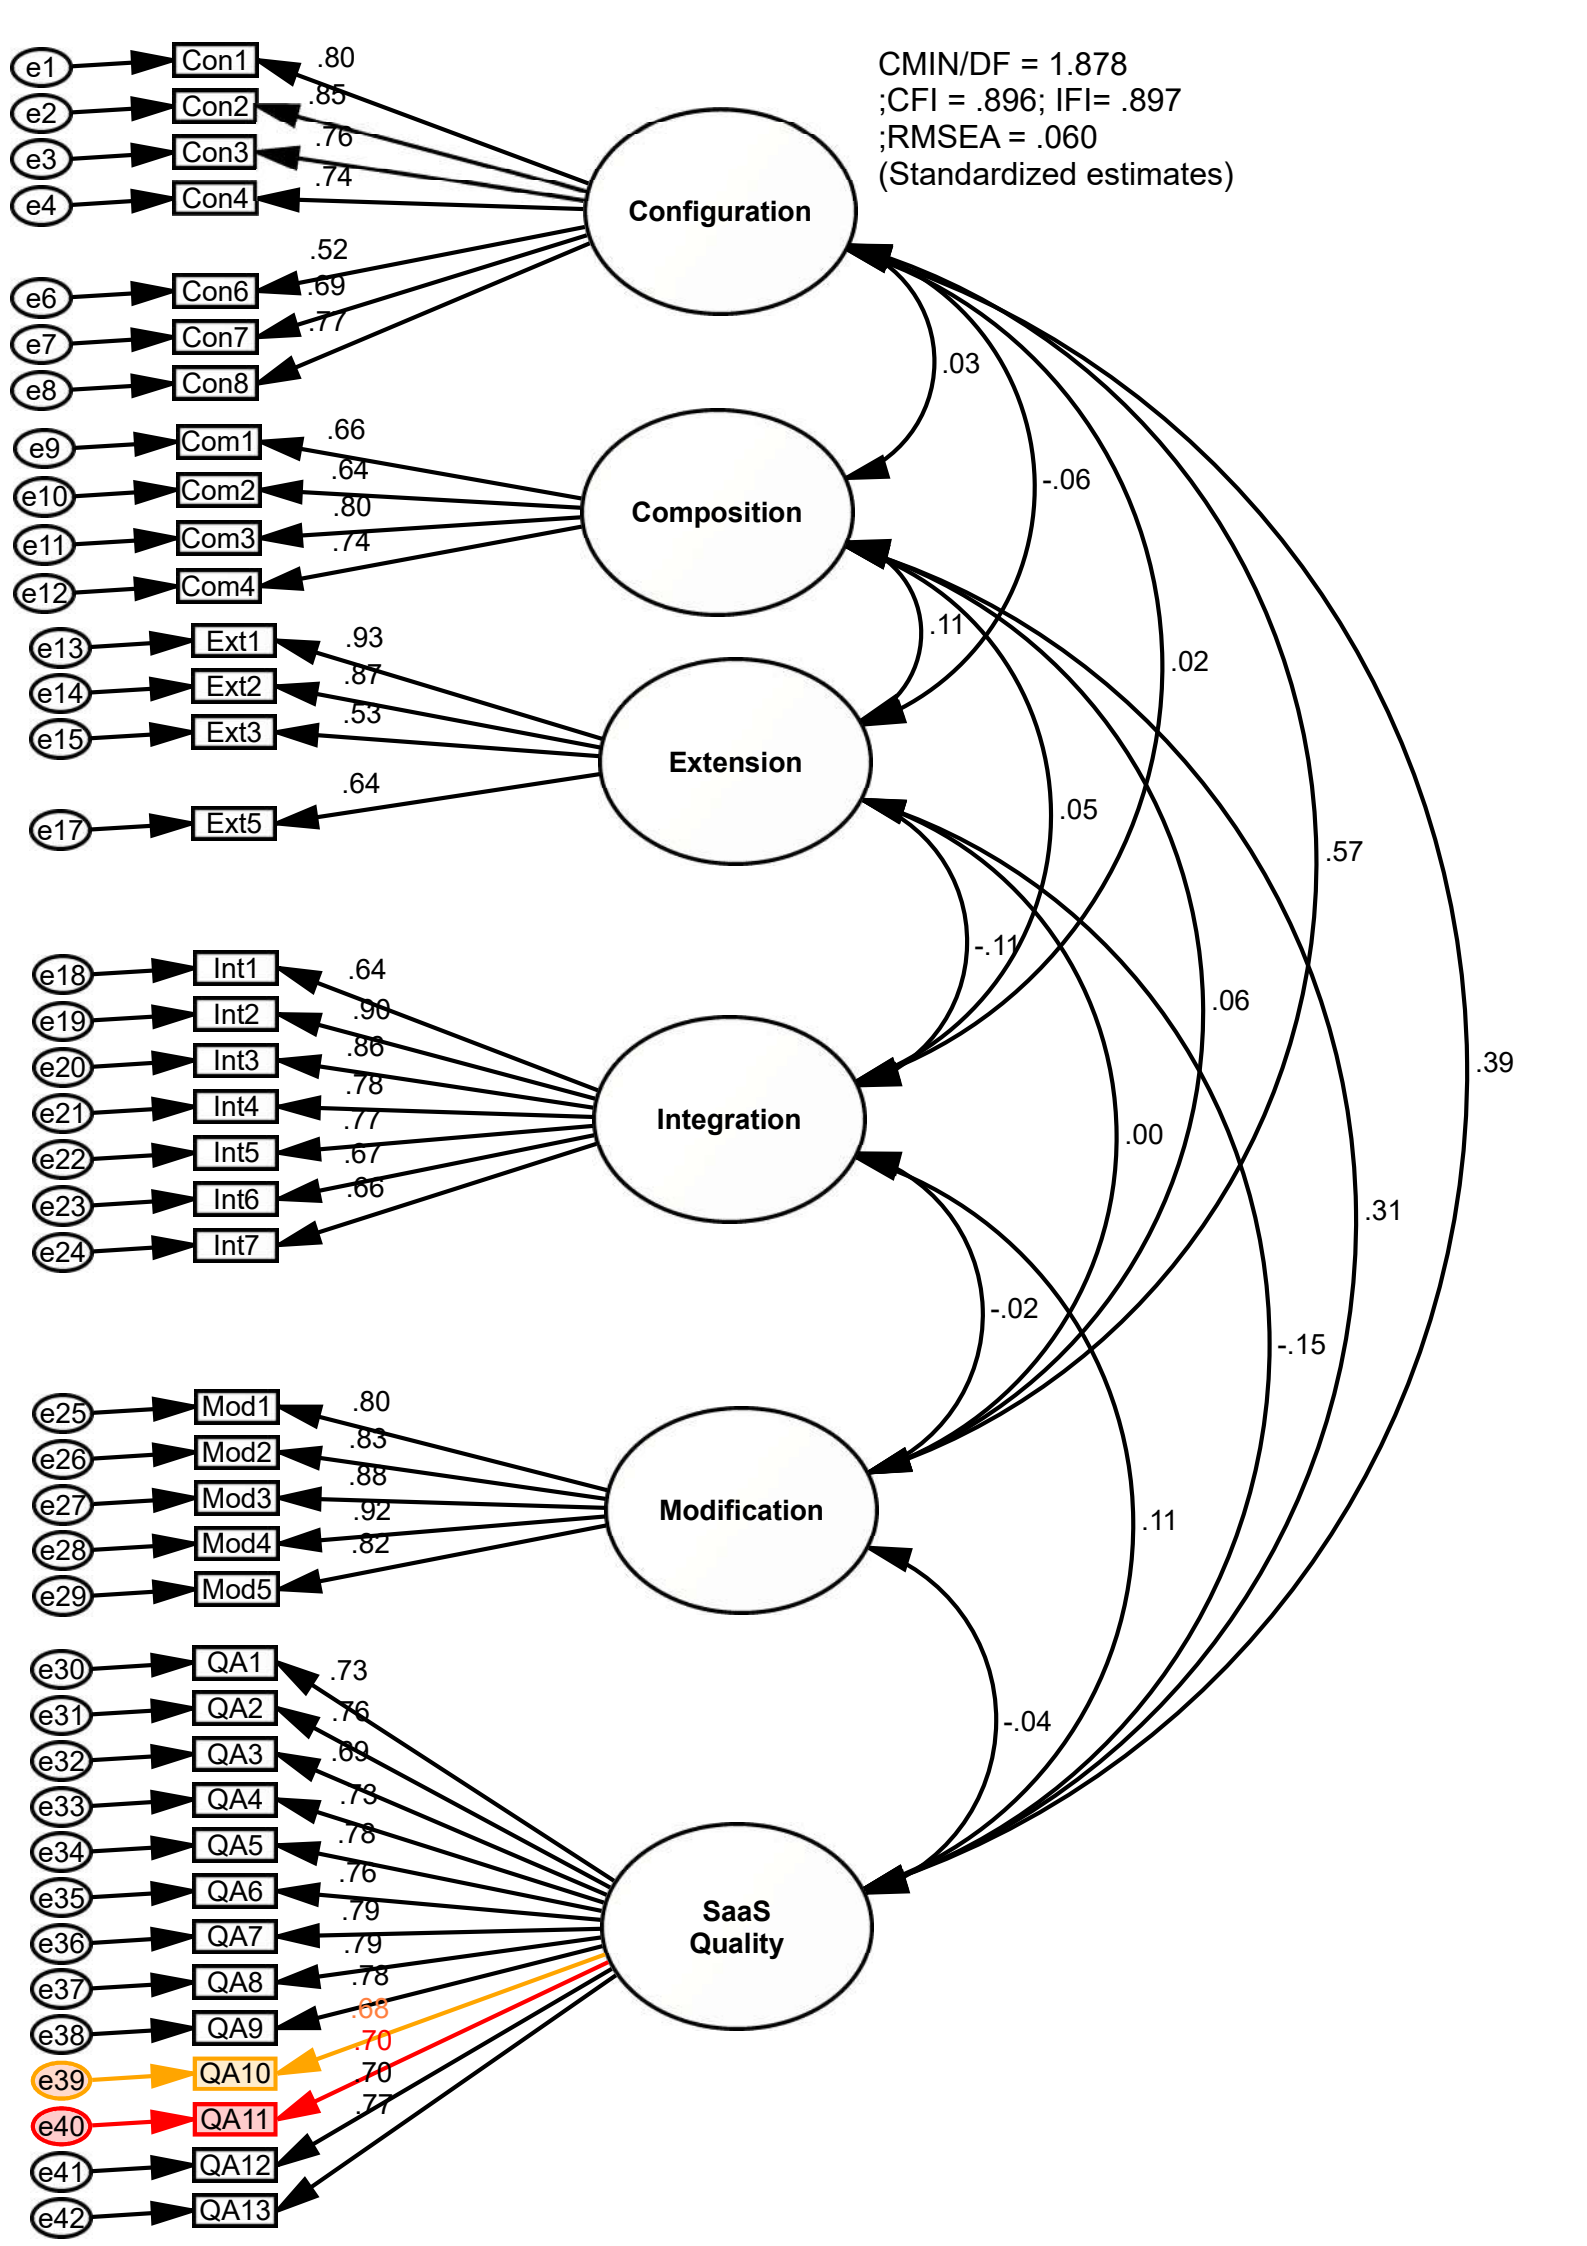

Supplement: s1 [file s1]

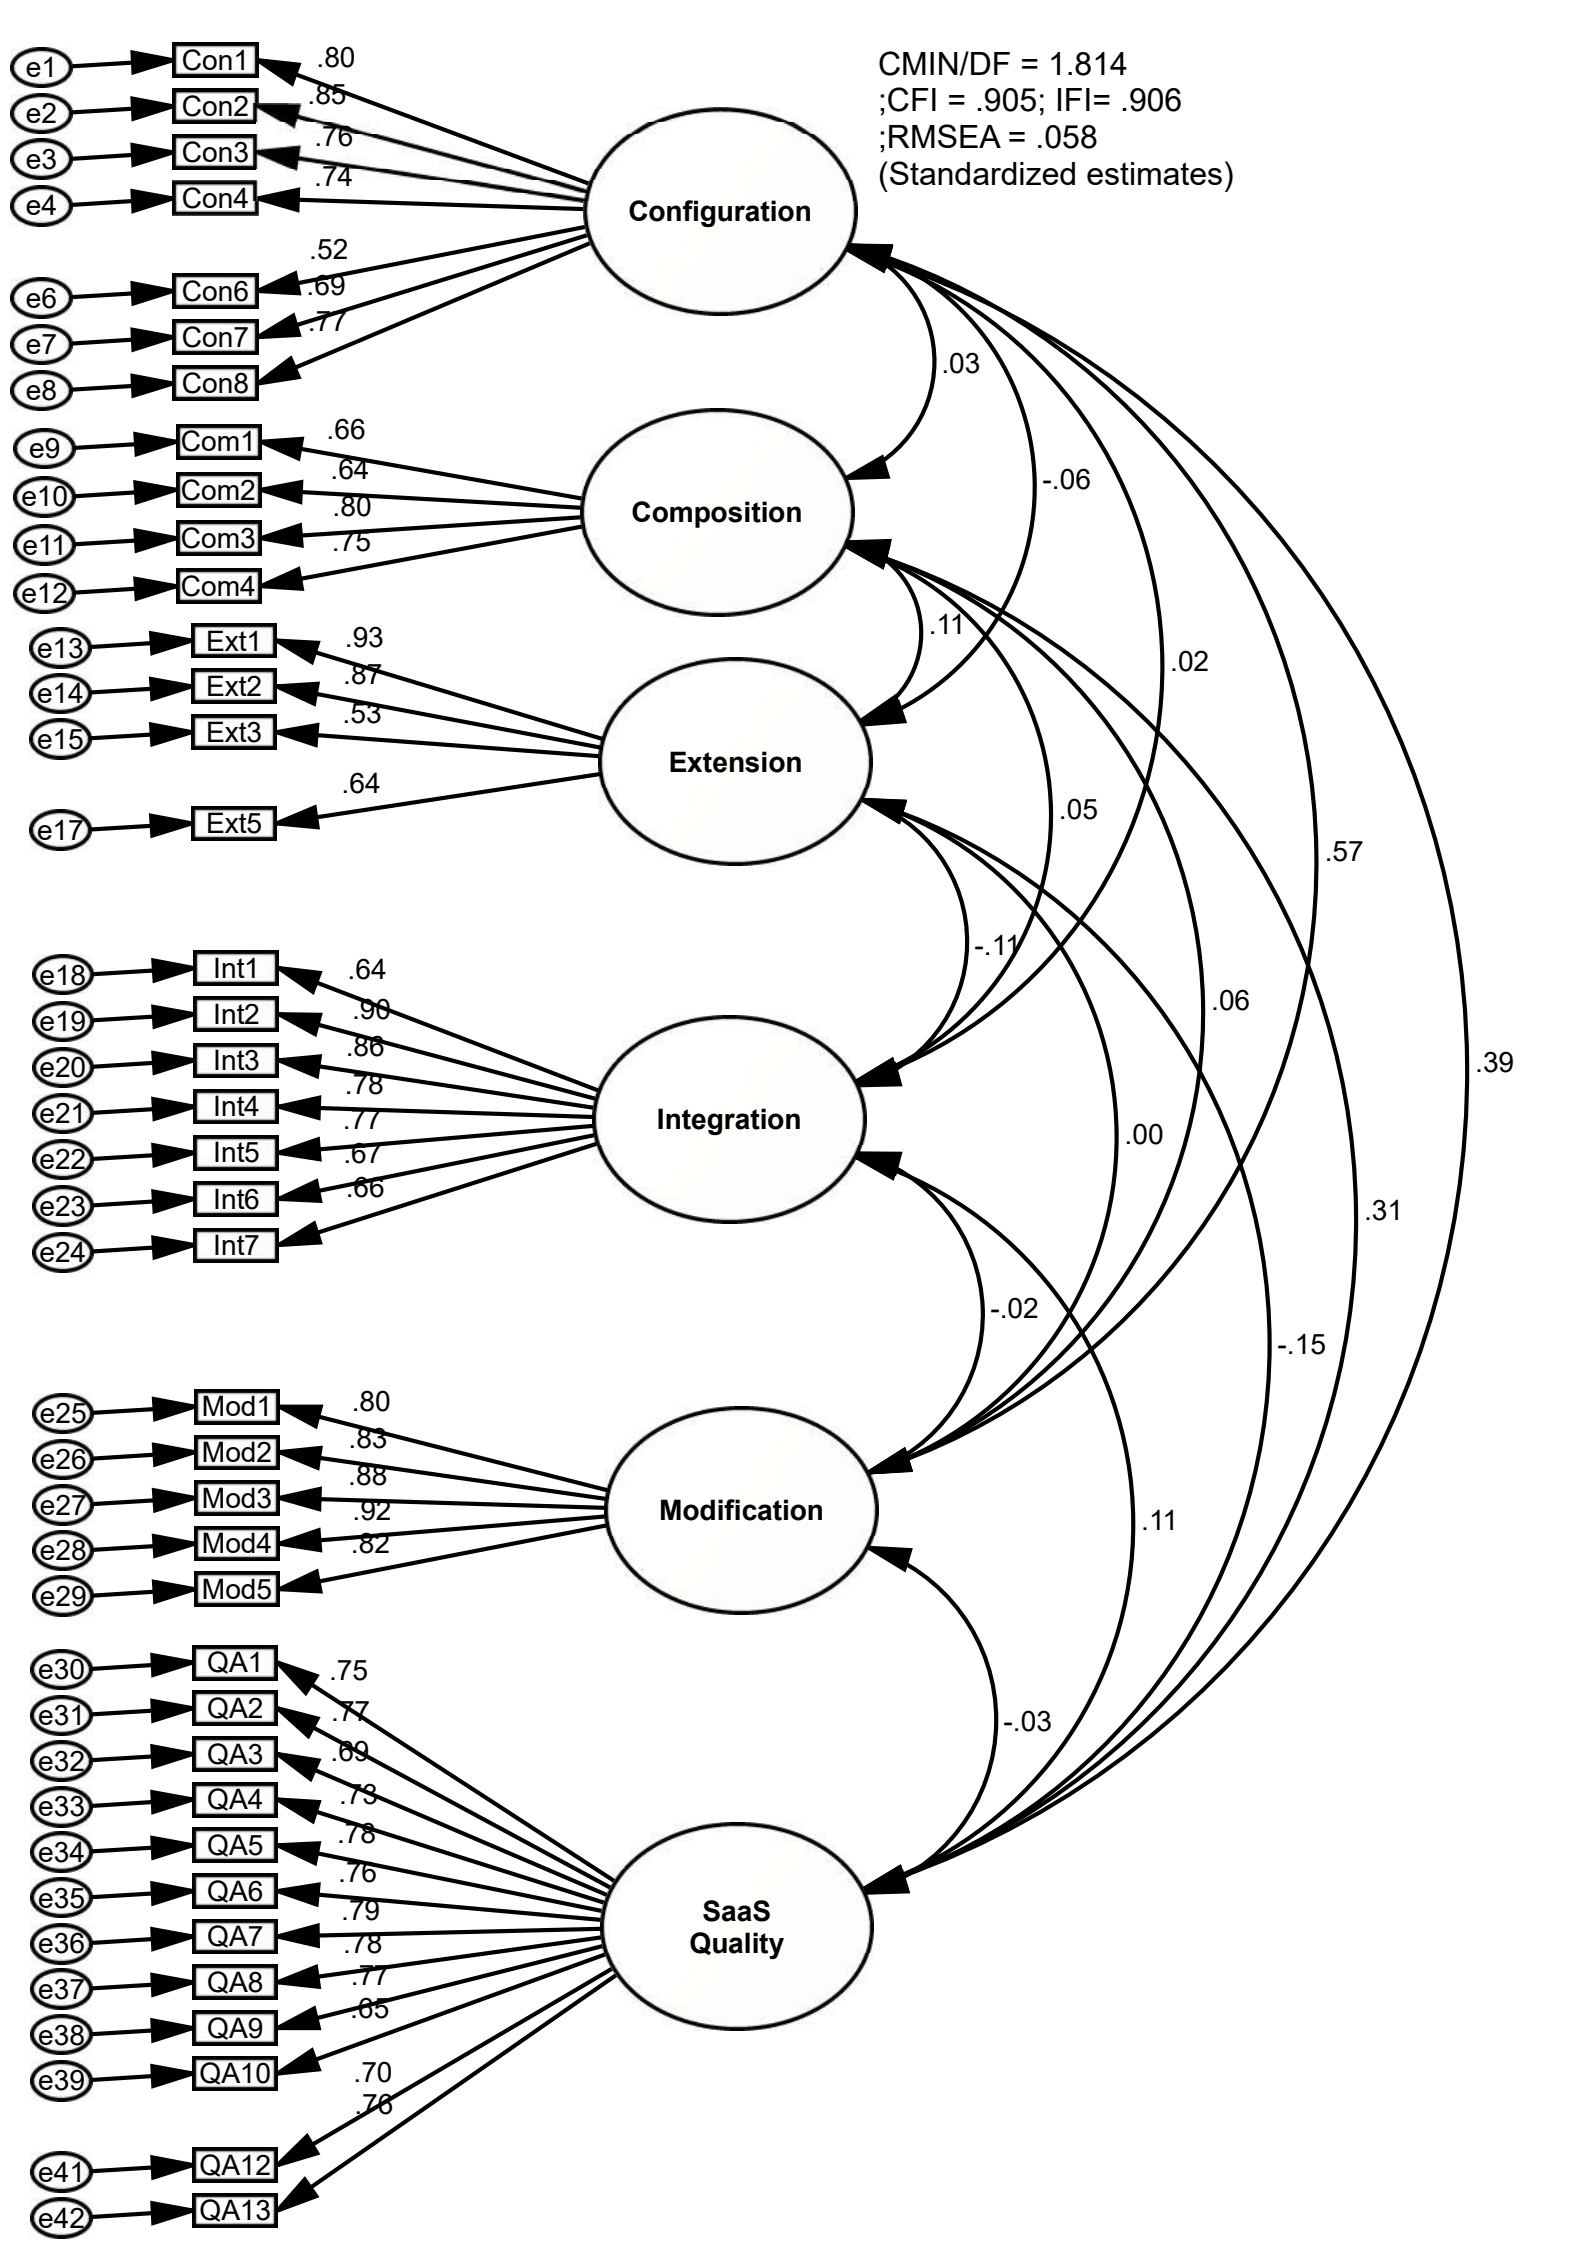

Supplement: s1 [file s1]

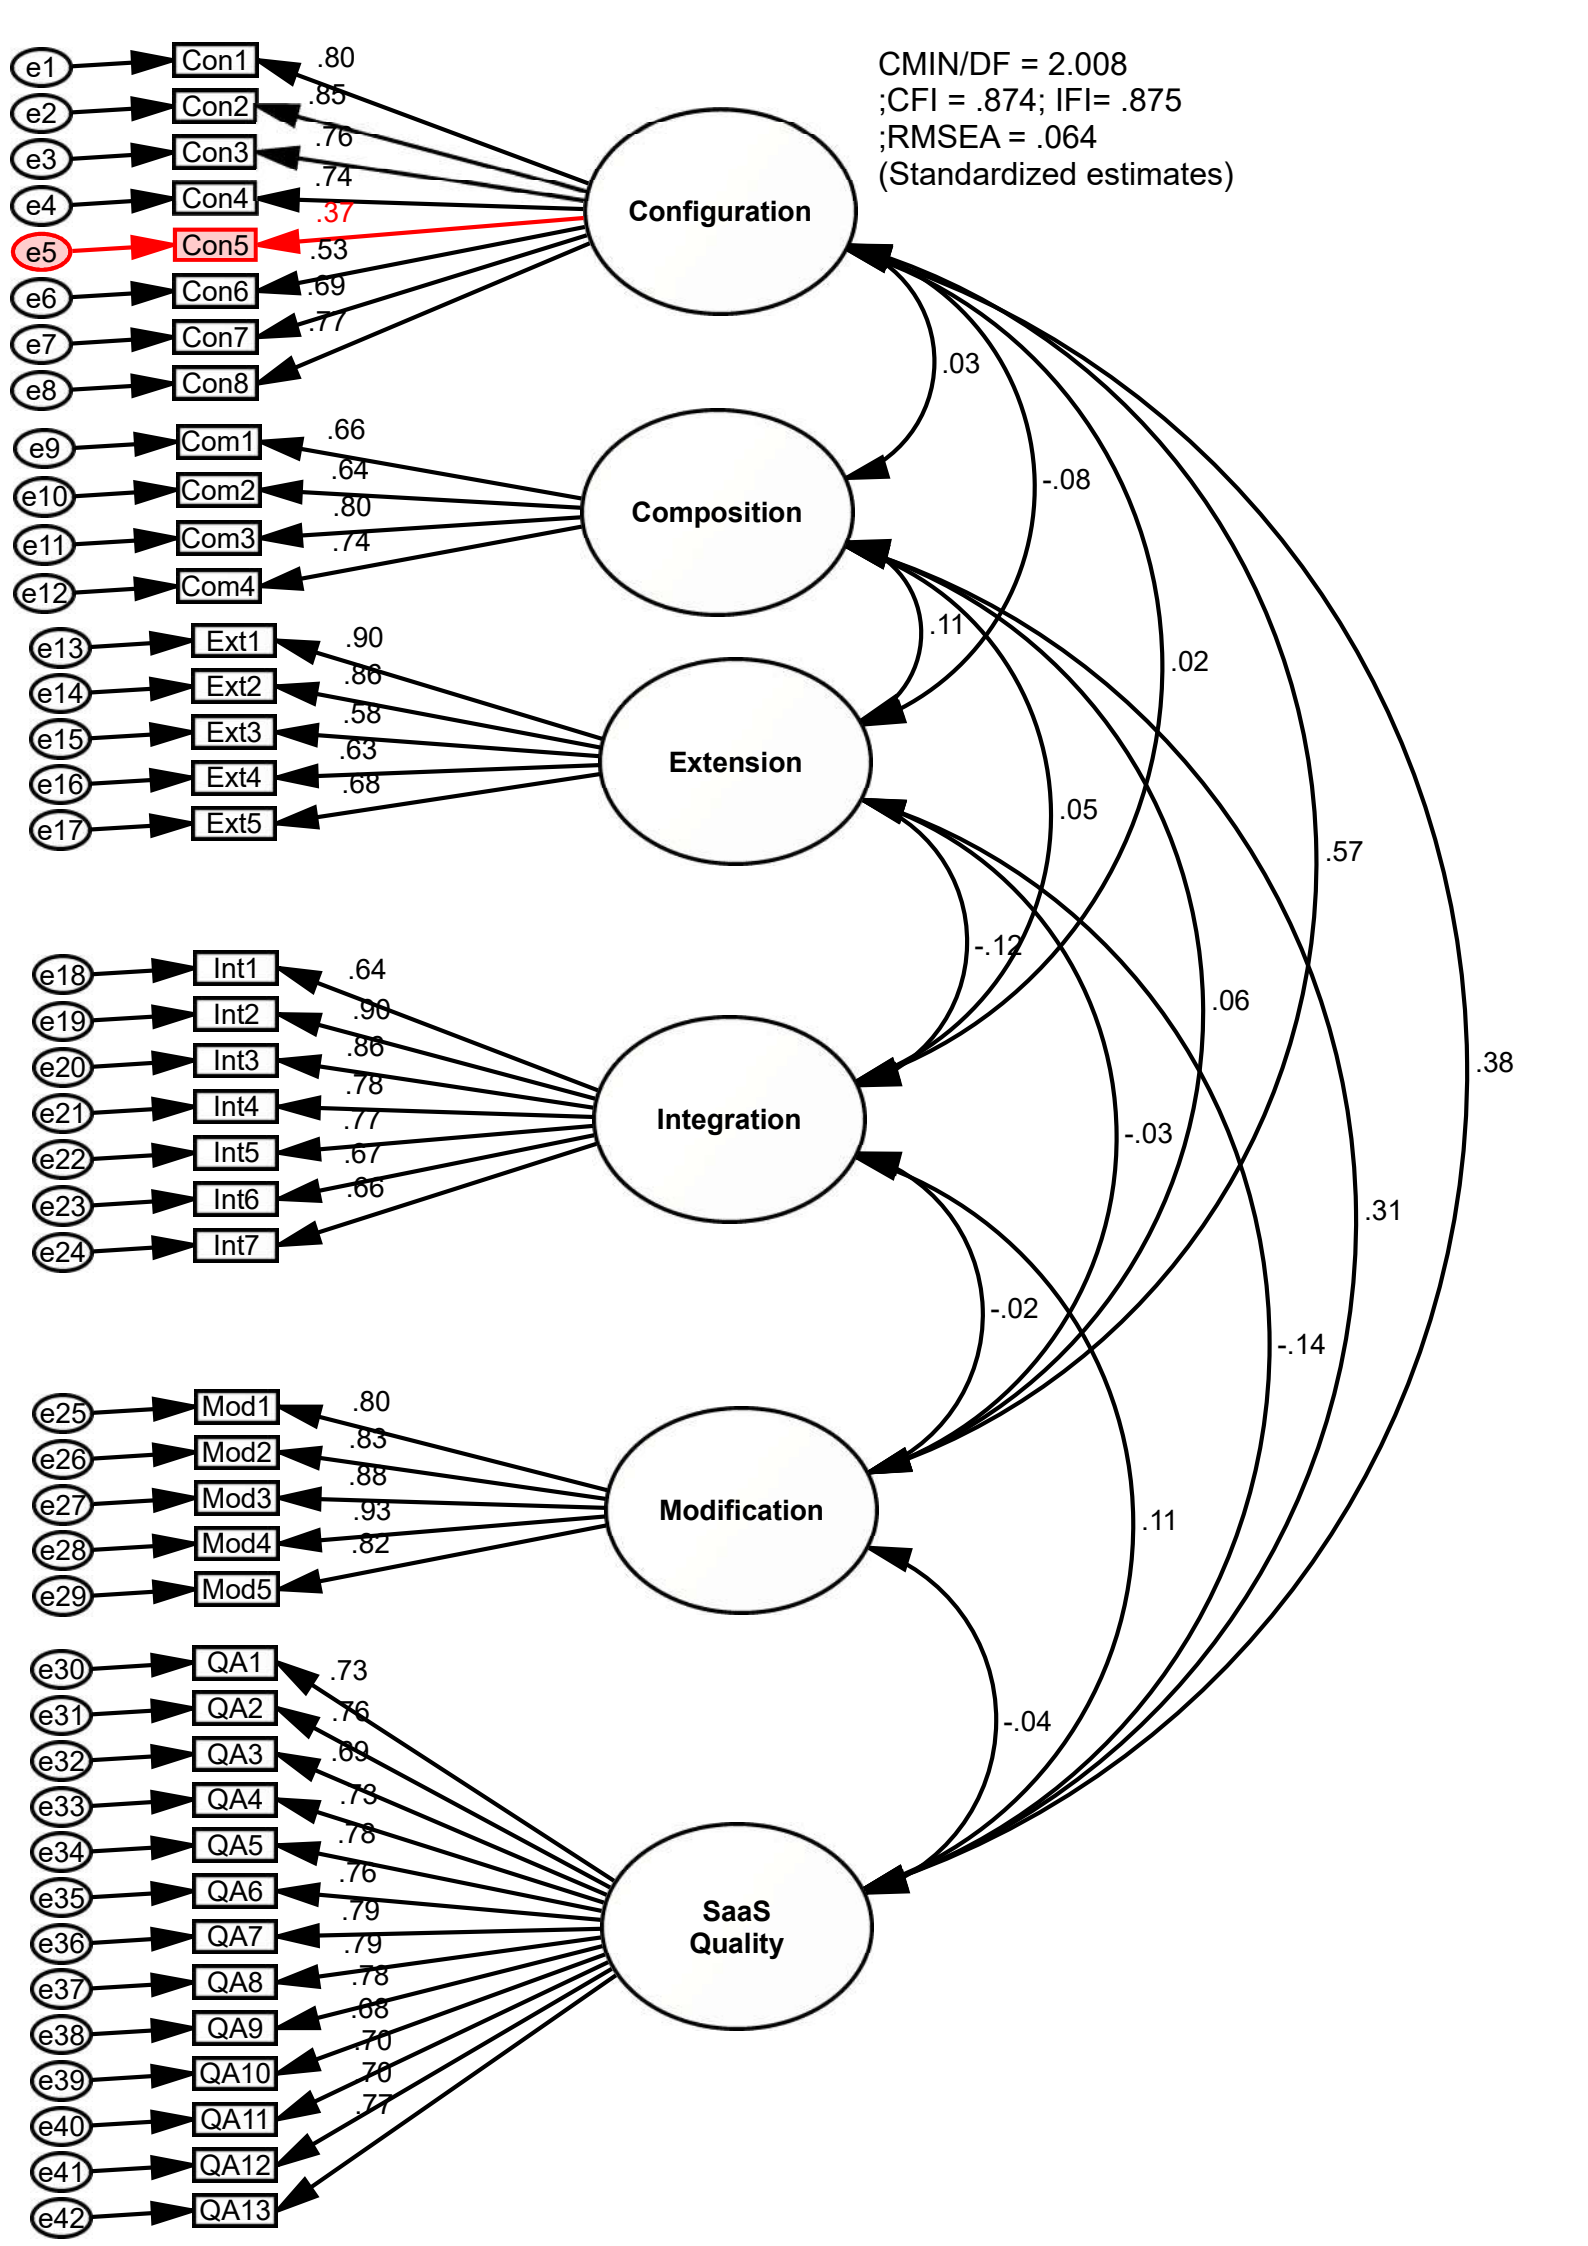

Supplement: s1 [file s1]
